# Supplementary material
Source: PubMed Central journal article supplement (PMC1829262)

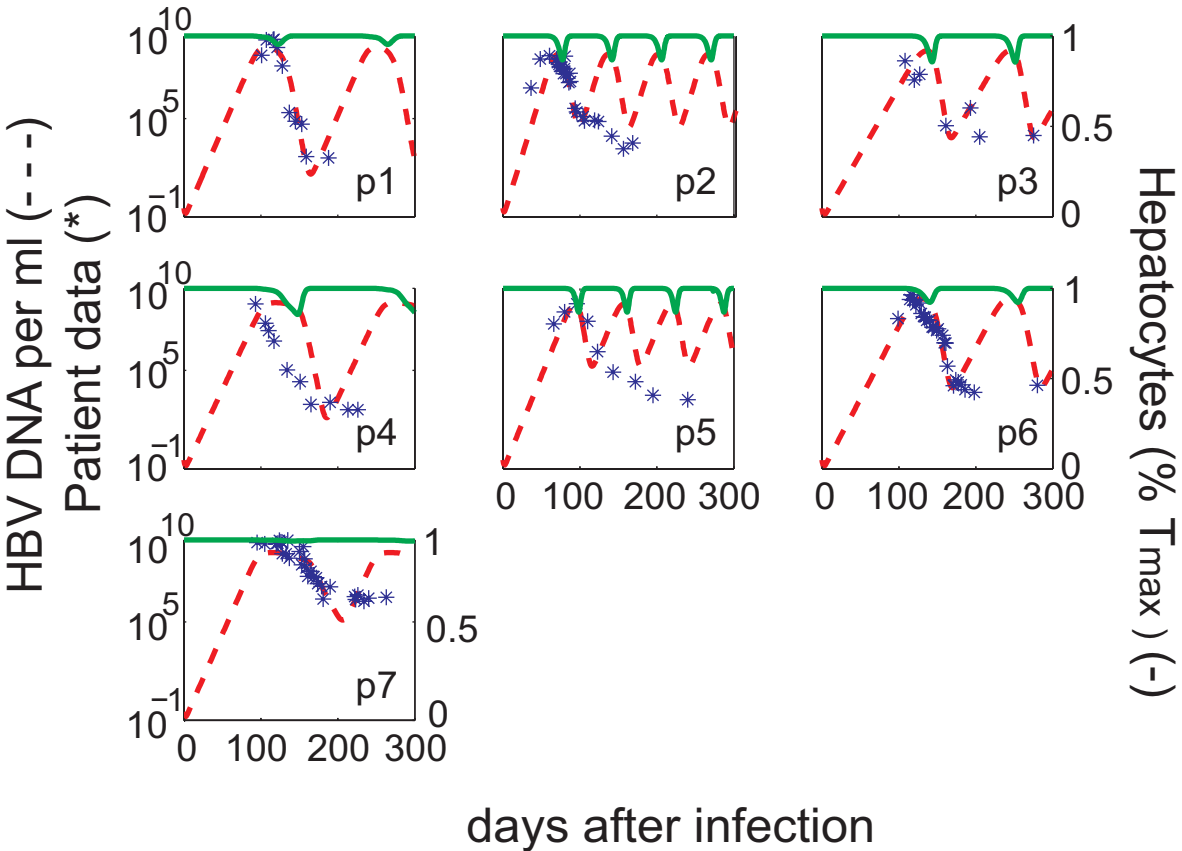

Supplement: pnas_0603626104_1.pdf [file pnas_0603626104_1.pdf]

HBV DNA per ml (---)

Patient data (\*)

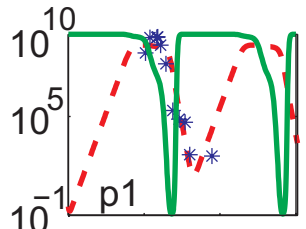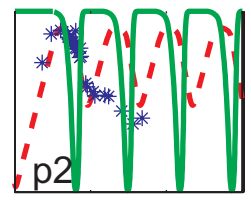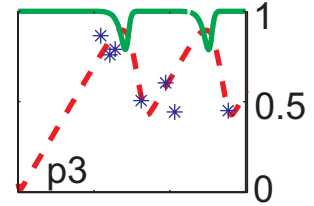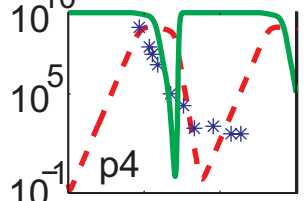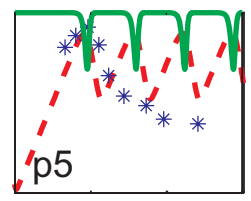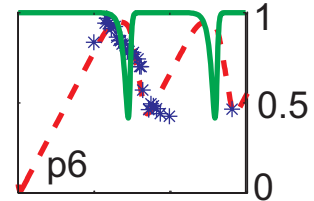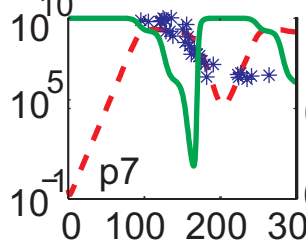

Hepatocytes (% T<sub>max</sub>) (-)

days after infection

Supplement: pnas_0603626104_2.pdf [file pnas_0603626104_2.pdf]

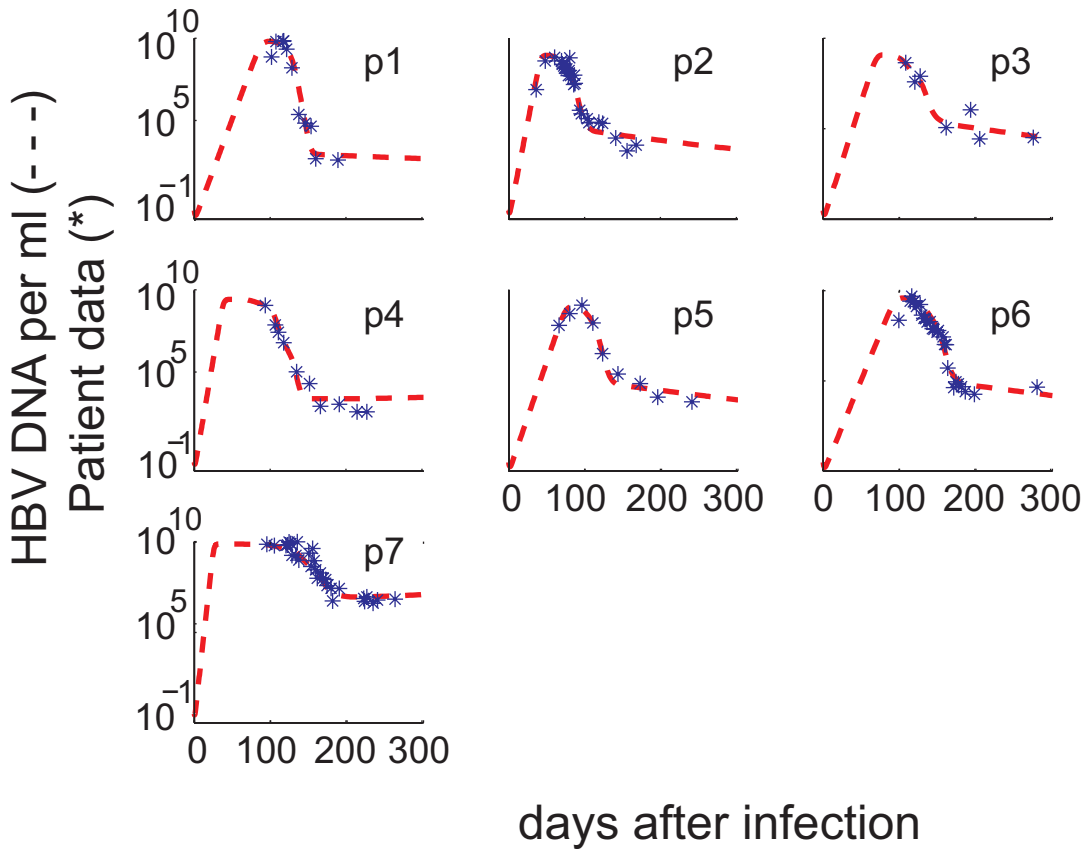

Supplement: pnas_0603626104_3.pdf [file pnas_0603626104_3.pdf]

HBV DNA per ml (---)  
Patient data (\*)

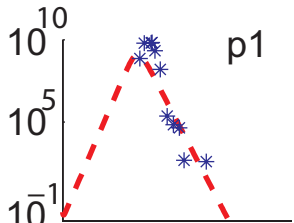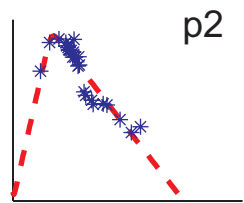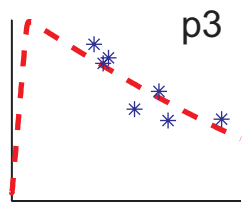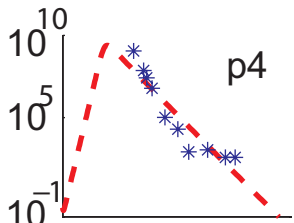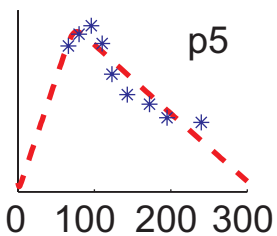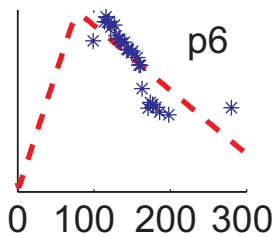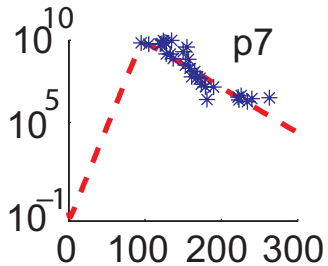

Supplement: pnas_0603626104_4.pdf [file pnas_0603626104_4.pdf]

HBV DNA per ml (---)  
Patient data (\*)

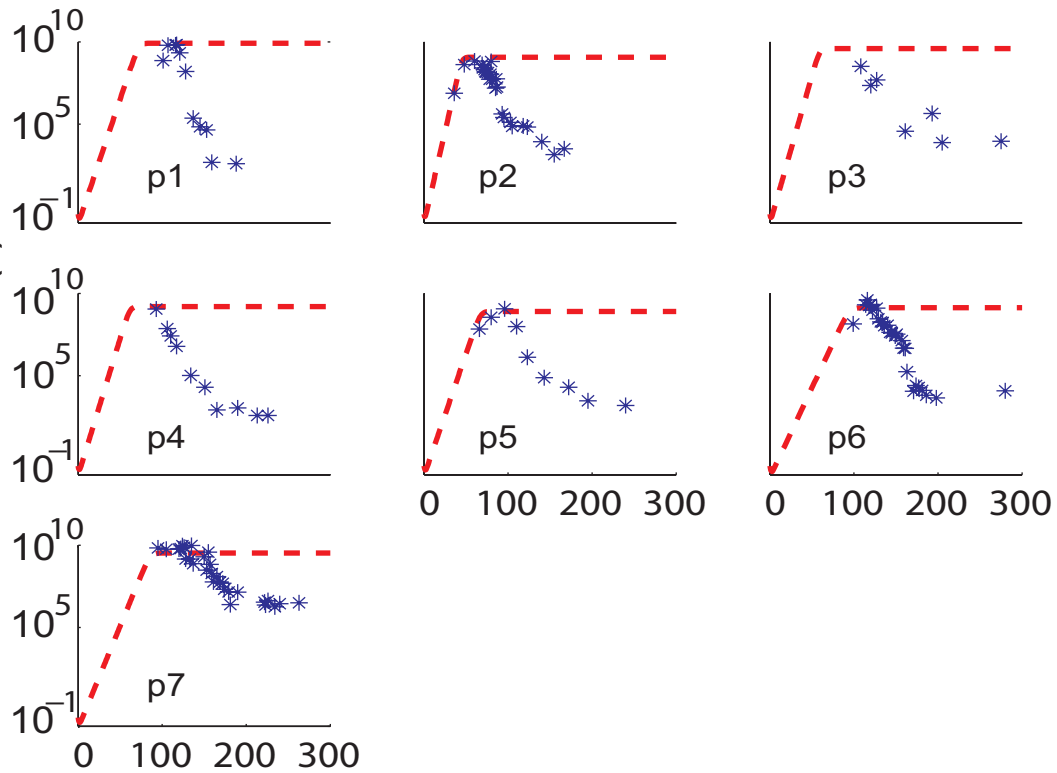

days after infection

Supplement: pnas_0603626104_5.pdf [file pnas_0603626104_5.pdf]

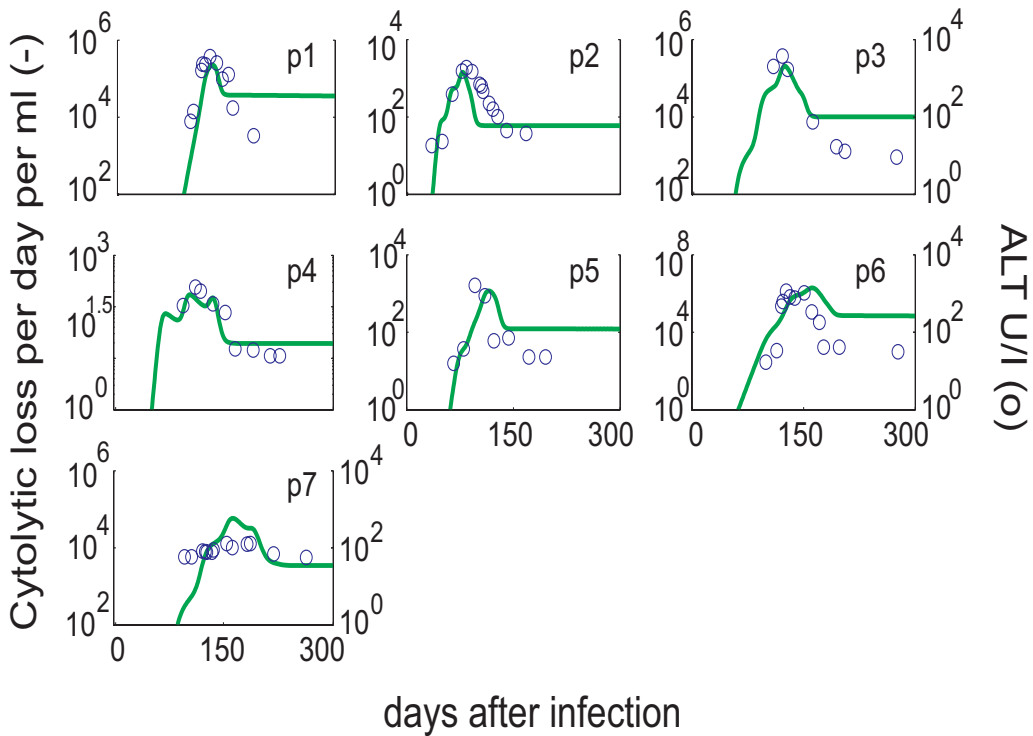

Supplement: pnas_0603626104_6.pdf [file pnas_0603626104_6.pdf]

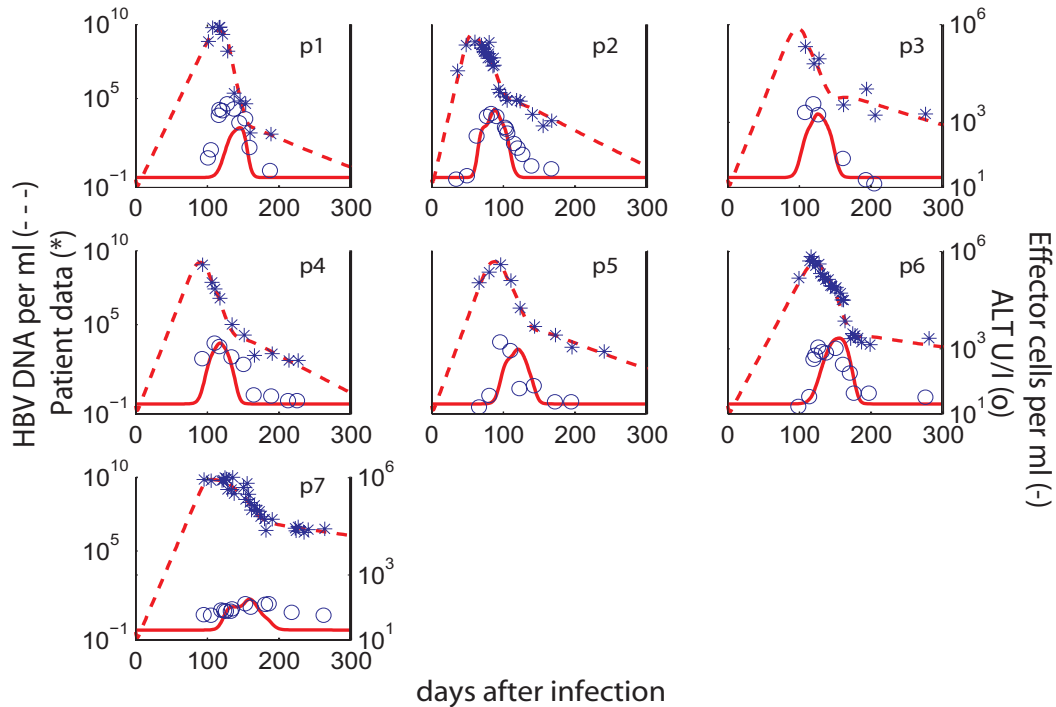

Supplement: pnas_0603626104_7.pdf [file pnas_0603626104_7.pdf]
